# Supplementary material for: The Effects of Brown Algae-Derived Monosaccharide L-Fucose on Lipid Metabolism in C57BL/6J Obese Mice
Source: MDPI journal article supplement (doi:10.3390/nu12123798), 2020-12-11
Supplement: s1 [file s1]

Supplementary Materials:

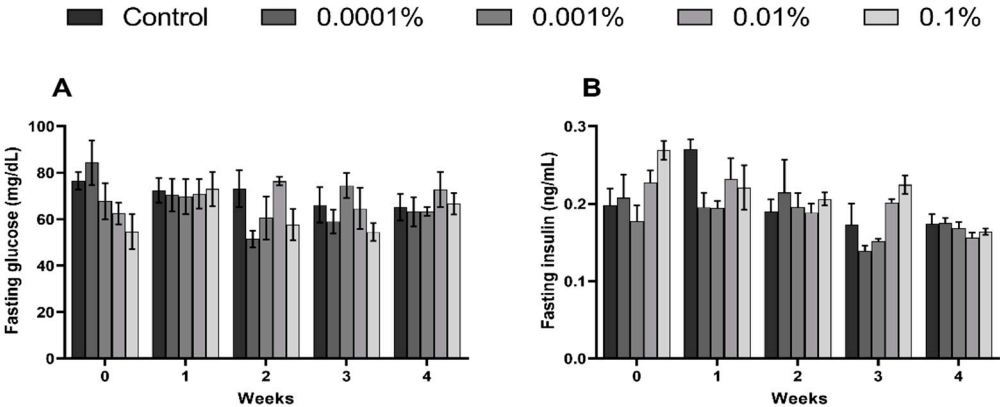

Figure S1. Fasting serum glucose (A), fasting serum insulin (B) were measured.

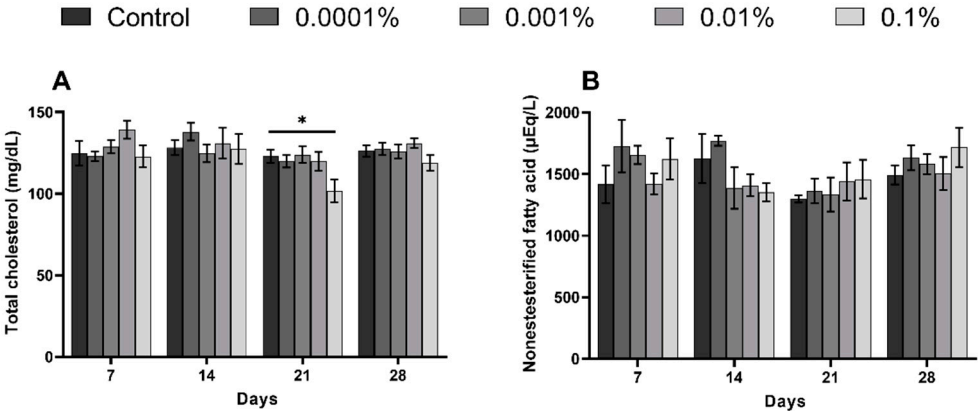

Figure S2. Serum level of total cholesterol (A) and non-esterified fatty acid fatty acid (B) were measured. (\*:  $p < 0.05$ ).
